# Supplementary material
Source: PubMed Central journal article supplement (PMC3228225)
Supplement: supp_the2010-0258_Supplemental_Online_Data.pdf [file supp_the2010-0258_Supplemental_Online_Data.pdf]

## Supplemental Online Data

**Appendix Figure 1.** Main principles of allelic discrimination and detection strategies.

Main principles of allelic discrimination and detection strategies; the lines indicate which detection methodology can be applied following allelic discrimination.

**Appendix Figure 2.** Typical enzymes used in genotyping technologies.

DNA ligases link double-strand DNA breaks by forming phosphodiester bonds, whereas endonucleases and exonucleases cleave nucleotides of a polynucleotide sequence by hydrolyzing phosphodiester bonds.

**Appendix Figure 3.** Principle of single base extension and allele-specific PCR.

**(a–b):** Single base extension: A common forward primer binds just upstream of the SNP. Upon addition of dideoxynucleotide triphosphates (ddNTPs) and polymerase, the primer is extended with the complementary ddNTP, whereafter chain-extension stops. Detection is either by mass-spectrometry **(a)** or by fluorescence **(b)**. **(c):** Allele-specific PCR: Allele-specific forward primers for the region of interest bind to the template DNA and are subsequently extended by dNTPs. DNA amplification results in an increase in fluorescence signal.

**Appendix Figure 4.** Principle of the Taqman assay.

Taqman assay: This assay uses two allele-specific probes carrying a quencher dye and for each probe a different reporter dye. Only the perfectly matched probe with 100% complementarity to the DNA template is hybridized and cleaved during PCR amplification. Upon cleaving, the reporter is released from the quencher that subsequently emits its fluorescence.

**Appendix Figure 5.** Principle of ligation-based genotyping.

Allele-specific labeled probes hybridize at the SNP-site and a common probe binds immediately downstream of it. In case of perfect complementarity, DNA ligase joins the probes together to form one oligonucleotide, detectable by fluorescence.

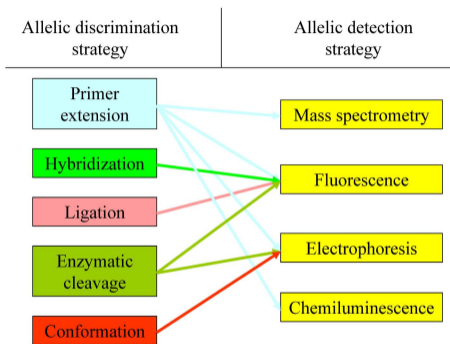

**Supplemental Online Appendix Figure 1.**

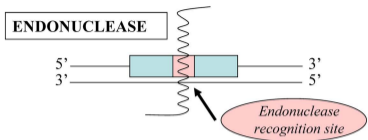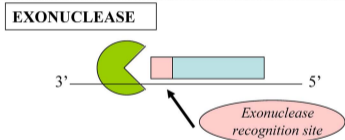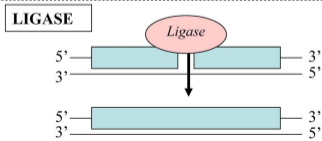

**Supplemental Online Appendix Figure 2.**

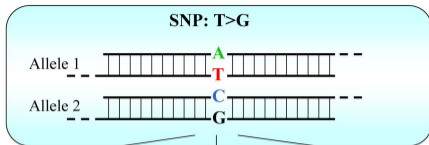

a) SBE – mass spectrometry

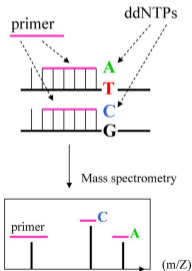

b) SBE – fluorescence

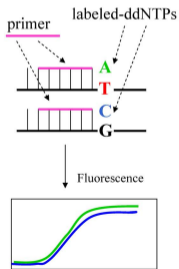

c) Allele specific PCR

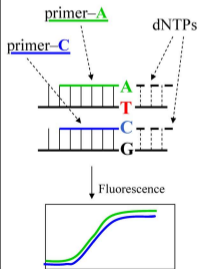

**Supplemental Online Appendix Figure 3.**

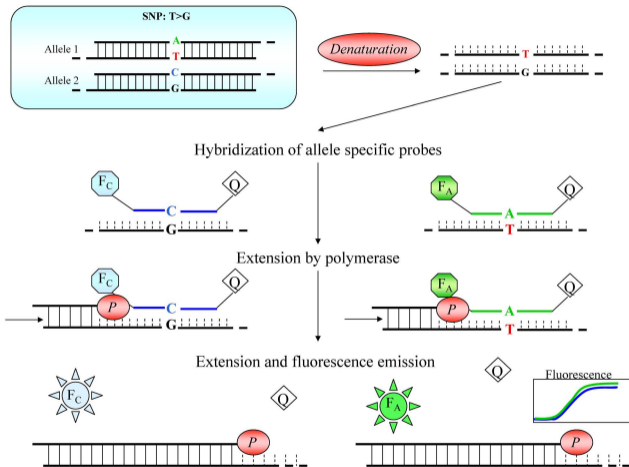

**Supplemental Online Appendix Figure 4.**

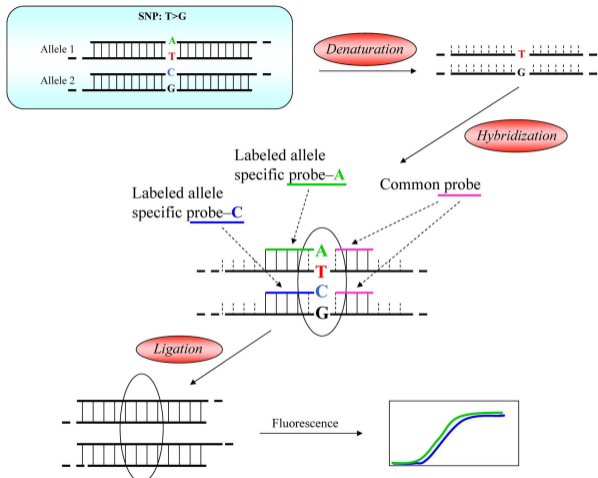

**Supplemental Online Appendix Figure 5.**
